# Characterizing a collective and dynamic component of chromatin immunoprecipitation enrichment profiles in yeast

Lucas D. Ward<sup>1,3</sup>, Junbai Wang<sup>1,4</sup>, and Harmen J. Bussemaker<sup>1,2,§</sup>

<sup>1</sup>Department of Biological Sciences, Columbia University, 1212 Amsterdam Ave., New York, NY 10027, USA

<sup>2</sup>Center for Computational Biology and Bioinformatics, Columbia University, 1130 St. Nicholas Ave., New York, NY 10032, USA

<sup>3</sup>Current address: Computer Science and Artificial Intelligence Laboratory, Massachusetts Institute of Technology, Cambridge, MA 02139, USA

<sup>4</sup>Current address: Department of Pathology, Oslo University Hospital - The Norwegian Radium Hospital, Montebello 0310 Oslo, Norway

§Corresponding author

Email addresses:

LDW: [lukeward@mit.edu](mailto:lukeward@mit.edu)

JW: [junbai.wang@rr-research.no](mailto:junbai.wang@rr-research.no)

HJB: [hjb2004@columbia.edu](mailto:hjb2004@columbia.edu)

## ABSTRACT

**Background** – Recent chromatin immunoprecipitation (ChIP) experiments in fly, mouse, and human have revealed the existence of high-occupancy target (HOT) regions or “hotspots” that show enrichment across many assayed DNA-binding proteins. Similar co-enrichment observed in yeast so far has been treated as artifactual, and has not been fully characterized.

**Results** – Here we reanalyze ChIP data from both array-based and sequencing-based experiments to show that in the yeast *S. cerevisiae*, the collective enrichment phenomenon is strongly associated with proximity to noncoding RNA genes and with nucleosome depletion. DNA sequence motifs that confer binding affinity for the proteins are largely absent from these hotspots, suggesting that protein-protein interactions play a prominent role. The hotspots are condition-specific, suggesting that they reflect a chromatin state or protein state, and are not a static feature of underlying sequence. Additionally, only a subset of all assayed factors is associated with these loci, suggesting that the co-enrichment cannot be simply explained by a chromatin state that is universally more prone to immunoprecipitation.

**Conclusions** – Together our results suggest that the co-enrichment patterns observed in yeast represent transcription factor co-occupancy. More generally, they make clear that great caution must be used when interpreting ChIP enrichment profiles for individual factors in isolation, as they will include factor-specific as well as collective contributions.

## KEYWORDS

Transcription factors, chromatin immunoprecipitation, *Saccharomyces cerevisiae*

## BACKGROUND

In addition to mapping canonical transcription factor (TF) binding sites, chromatin immunoprecipitation (ChIP) experiments have revealed genomic loci at which many DNA-binding proteins display a signal of enrichment despite the absence of an *in vitro* binding site in the underlying DNA sequence. These regions have been alternatively called “TF colocalization hotspots” [1] and “high-occupancy target (HOT) regions” [2]. Their existence was first demonstrated in a study profiling seven *Drosophila melanogaster* TFs with diverse functions using the DamID method in cultured embryonic cells [1]. In that study, DNA at the hotspots was predicted to have affinity for three of the seven proteins (Gaf, Jra, and Max), but was bound by all seven. The hotspots were associated with increased expression at neighboring genes, suggesting that they are functionally relevant. Subsequent ChIP studies in whole embryos have confirmed that such hotspots are a general feature of the *Drosophila* [3-5] and the *C. elegans* [6] genomes. The TF colocalization phenomenon has also been observed in mammalian cells. An analysis of ChIP profiles for 13 TFs collected in mouse embryonic stem cells revealed extensive colocalization of these proteins along the genome [7]. Similarly, analysis of 89 sequence-specific TFs in a variety of human cell types [8] identified many HOT regions [2].

A number of mechanisms have been proposed to explain the observed co-enrichment across ChIP experiments. Chromatin loops could cross-link to multifunctional “transcription factories” or enhanceosomes [9]. Non-sequence-specific binding can also be driven by a locally permissive chromatin structure [3, 10]. The authors of the fly DamID study [1] argue against non-specific binding, because two non-endogenous proteins (mutant fly Bcd consisting of only a DNA-binding domain, and yeast Gal4p consisting of only a DNA-binding domain) do not localize to the hotspots, but rather to their predicted *in vitro* binding sites. Direct protein-protein interactions between the involved fly TFs have also not been observed, complicating any model involving a transcription factory. The authors of the mouse study [7], by contrast, suggest that the mouse hotspots represent enhanceosomes, due to their

ability to drive transcription in a luciferase assay and their recruitment of the p300 coactivator. A feature shared by both organisms is that hotspots are associated with increased expression at neighboring genes, but are often located far from traditionally-defined proximal promoters.

The present study was motivated by the fact that, although extensive genome-wide *in vivo* protein binding data has been collected for the yeast *Saccharomyces cerevisiae* [11-13], no analogous colocalization of sequence-specific regulators has been reported for this organism. Significantly, however, in the large-scale compendia by Lee et al. [12] and Harbison et al. [11], the authors subtracted, for each probe separately, the mean across all arrays in order to account for biases in the immunoprecipitation reaction. This normalization procedure was certainly appropriate given the goal of these studies, namely, to determine the specific transcriptional target genes of each individual transcription factor. However, it would also have largely removed any true collective genomic enrichment pattern shared by many TFs. This insight motivated us to perform a detailed re-analysis of the original microarray data in a manner that omitted the probe-specific normalization step. This revealed that a collective pattern of ChIP enrichment also exists in yeast.

Unlike in higher eukaryotes, the collective enrichment patterns in yeast are not associated with sequence-predicted protein-DNA binding affinity for any of the TFs involved. Rather, sequence and functional analysis reveals that the most significant features of co-enriched probed regions are: (i) the extent of nucleosome depletion, (ii) expression of proximal genes, and (iii) the proximity to noncoding RNA genes, the majority of which encode tRNAs and snoRNAs. Additionally, the co-enrichment hotspots are occupied chiefly in rich-media (YPD) conditions, while, strikingly, the phenomenon is abrogated in the majority of environmental perturbation and stress conditions.

## RESULTS

### Quantifying collective ChIP enrichment in rich media conditions

First, we performed a detailed re-analysis of the raw ChIP-chip data from Lee et al. [12] and Harbison et al. [11], but *without* performing their normalization procedure across experiments (see Methods). To characterize the shared component of the ChIP profiles collected in rich media (YPD), we computed the median  $\log_2$  fold-enrichment (MLFE) across 195 TFs as a measure of co-enrichment for each probe. The distribution of MLFE across probes was skewed heavily to the right (**Figure 1**), a shared enrichment profile that was evident in the authors' original analysis but not fully characterized. The re-analyzed ChIP landscapes were also more correlated with each other than the normalized profiles from the original paper (**Figure 2**). We proceeded to investigate the location of the co-enrichment phenomenon relative to genomic features.

### Collective enrichment is strongly associated with noncoding-RNA genes

A first glance at the most highly co-enriched probed regions revealed a preponderance of telomeres and noncoding RNAs (ncRNAs) (**Table 1**). To systematically determine whether specific genomic features were associated with co-enrichment, we tested whether the distribution of MLFE for probes corresponding to each annotated genomic feature was different from that corresponding to the rest of the genome (**Table 2**). The most significantly co-enriched were the 514 probes corresponding to ncRNA genes (difference of median fold enrichment  $\Delta\text{MLFE} = 0.27$ ;  $p = 6.9 \times 10^{-161}$ , Student's t-test;  $p < 2.2 \times 10^{-16}$ , Wilcoxon-Mann-Whitney test). The more specific ncRNA categories of tRNAs, snoRNAs, and snRNAs were all significantly co-enriched as well. There were not enough probes corresponding to rRNA genes to establish statistical significance.

A subset of yeast tRNA genes have been demonstrated to colocalize to the nucleolus. We therefore asked whether TF co-enrichment is associated with nucleolar localization. We used the classification of yeast tRNA genes as nucleolar or non-nucleolar based on a three-dimension model of the yeast genome derived from chromatin conformation capture data by Duan et al. [14]. However, we found no significant difference in rich media MLFE between the two sets of genes ( $t = 0.67$ ,  $p =$

0.51). Therefore, nucleolar and centromeric tRNA genes seem to participate in the collective enrichment phenomenon to an equal degree.

### **Evidence that collective enrichment is not due to technical artifact**

Because telomeres and tRNA genes are associated with repetitive elements [15-16] in addition to having a high genomic copy number, we suspected that their consistently high enrichment across experiments could be an artifact of cross-hybridization [17-18]. To test for this, we inspected spot intensities and performed a more finely-grained classification of probes (**Table 3**; see Methods). We decided to exclude probes corresponding to telomeres or overlapping ncRNA genes by more than 25 bp from the remainder of our analysis (see Methods).

A plot of MLFE versus distance between the center of each probe and the center of the nearest ncRNA gene (**Figure 3**) shows a gradual and approximately exponential decay with increasing distance. The decay length is similar to a typical IP fragment length [19]. By contrast, cross-hybridization would appear as spikes as a function of genomic position with no such decay around peaks, as was discussed by Orian and colleagues [20]. We conclude that cross-hybridization is not responsible for the observed signal.

Biases in IP efficiency and shearing based on chromatin state have been shown to be important in the interpretation of ChIP experiments [21-22]. To check whether such biases affected immunoprecipitation or hybridization efficiency of ncRNA genes, we inspected control experiments that used no antibody or a nonspecific antibody [23]. We observed a weak depletion of ncRNA genes in the mock IP samples relative to the whole-cell extract (no-antibody:  $\Delta\text{MLFE} = -0.12$ ;  $p = 2.9 \times 10^{-24}$ , t-test; rabbit IgG:  $\Delta\text{MLFE} = -0.13$ ;  $p = 1.9 \times 10^{-23}$ , t-test; **Figure 3**). These controls suggest that any immunoprecipitation bias at ncRNA genes would cause us to underestimate rather than overestimate the magnitude of the hotspot effect.

The ChIP-chip experiments that we re-analyzed for this study all relied on myc-tagged proteins. In humans, the c-Myc protein is localized to the nucleolus, raising the possibility that myc-tagged proteins in the ChIP experiment would be artificially biased towards tRNAs genes, some of which cluster in the nucleolus [24-26]. To rule out this possibility, we performed the same analysis on a set of ChIP-chip data that employed FLAG tagging rather than myc tagging, and high-density tiling probes [27].

The kinases assayed in this experiment again showed shared IP at ncRNA genes and exponential decay with increasing distance between the probed region and the ncRNA gene, and a comparable quantitative enrichment near ncRNA genes ( $\Delta$ MLFE = 0.36;  $p = 2.1 \times 10^{-116}$ , t-test; **Figure 3**). Taken together, the above results make it unlikely that shared IP is due to a tag-specific artifact.

### **For most TFs, *in vitro* DNA binding specificity is a poor predictor of *in vivo* occupancy**

The canonical view holds that the DNA-binding domain (DBD) of a TF is responsible for its recruitment to specific sequences in the genome. However, highly specific yet DBD-independent recruitment to sites of co-occupancy has been demonstrated using recombinant Bicoid protein in *Drosophila* [1]. The landscape of co-enrichment that we have characterized represents an independent contribution to the ChIP enrichment landscape of any given TF, which complements the sequence-specific targeting via its DBD. We were interested in contrasting these two predictors and quantifying the extent to which each of them contributes to the overall genomic enrichment profile for a TF. To this end, we calculated the Pearson correlation, across all probes, between the  $\log_2$  fold enrichment (LFE) for each TF and (i) the median  $\log_2$  fold-enrichment (MLFE) over all other TFs profiled in rich media, and (ii) the regional *in vitro* binding affinity predicted from DNA sequence using a position-specific affinity matrix for the TF from protein-binding microarray (PBM) data from Badis et al. [28] and Zhu et al. [29] (**Figure 4**). For almost all TFs, the correlation with MLFE is significant (mean value of  $r = 0.31$ ), indicating that the co-enrichment signal contributes to their IP profile to a significant extent. A notable exception is Yap1p, whose LFE is significantly anticorrelated with the MLFE of all of other factors. For a smaller number of TFs, LFE correlates with predicted affinity, but always to a lesser extent than with MLFE (mean  $r = 0.04$ ), with the exception of Abf1p.

### **Co-enriched loci are associated with nucleosome depletion and high expression**

To explore other relationships between genome function and TF co-enrichment, we looked for Gene Ontology (GO) categories of proximal genes (**Table 4**). For every GO category, we compared the distribution of MLFE within probes corresponding to promoters of genes in that category with the rest of the probes. The most enriched protein functions are for translation (translational elongation,  $t = 13.8$ ,  $p = 7.7 \times 10^{-43}$ ; cytoplasmic translation,  $t = 13.8$ ,  $p = 1.1 \times 10^{-42}$ ) and accordingly, ribosomal proteins as a whole are strongly enriched ( $t = 10.4$ ,  $p = 3.1 \times 10^{-25}$ ). Because ribosomal

protein (RP) promoters are known to be particularly active [30], we were interested in whether expression globally correlates with co-enrichment, and found that it does (Pearson  $r = 0.17$ ,  $p = 1.1 \times 10^{-40}$ ; **Figure 5A**). We also found that co-enrichment is even more strongly anticorrelated with nucleosome occupancy (Pearson  $r = -0.31$ ,  $p = 1.3 \times 10^{-122}$ ; **Figure 5B**).

We were also interested in whether the TF co-enrichment profile was correlated with affinity for TFs. We calculated the predicted affinity of each probe for a compendium of TFs. Among TF affinities predicted from protein binding microarray (PBM) data, only affinity for Rsc30p, Rsc3p, and Rap1p correlated with MLFE (Pearson  $r = 0.07$ ,  $r = 0.06$ , and  $r = 0.06$ , respectively). Binding by these factors has previously been shown to drive nucleosome depletion at RP promoters [28, 31], consistent with the correlation with nucleosome depletion described above.

### **Collective enrichment at ncRNA genes is largely eliminated in perturbed conditions**

So far, our analysis has been restricted to rich media (YPD) conditions, providing a uniform chromatin context for comparison across factors. Examining ncRNA loci in experimental perturbation (“stress”) conditions reveals dramatically reduced co-enrichment (**Table 5** and **Figure 3**). Using the median TF enrichment across all non-YPD conditions, the elevation in co-enrichment at ncRNA genes drops from 0.25 to 0.03. To further investigate this general observation by focusing on ChIP enrichment of individual TFs in their rich media and stress conditions. For each particular stress-TF combination (i.e., each experiment), we calculated the enrichment at ncRNA genes relative to all other probes (**Figure 6**). As expected from our pooled analysis, in the majority of stress conditions the enrichment at ncRNA genes is greatly reduced. For two TFs, viz. Kss1p and Gal4p, ncRNA genes are preferentially ChIP enriched in YPD, while in stress the enrichment at ncRNA genes is lower than elsewhere in the genome. Kss1p shows a negative relative occupancy of ncRNA genes in alpha mating factor and 1-butanol conditions. Gal4p shows decreased preferential enrichment at ncRNA genes in galactose and avoidance of these loci in raffinose.

Interestingly, those TFs that do not participate in ChIP co-enrichment at ncRNA genes as strongly in rich media conditions are more likely to be ChIP-enriched at ncRNA genes in other conditions. The most notable example of this is Ste12p, which is enriched at ncRNA genes upon exposure to alpha mating factor, but not in the



absence of alpha factor or in the presence of 1-butanol. Dig1p, which is also associated with the mating response, behaves differently: it is not enriched at ncRNA genes in rich media, and is also not enriched at them in the presence of alpha mating factor and 1-butanol. Finally, among the other TFs that exhibit ncRNA depletion in rich media, Mot3p shows a loss of this depletion in the presence of hydrogen peroxide or sulfometuron methyl. The fact that enrichment at ncRNA genes is both factor and condition specific supports that the ChIP co-enrichment is not solely determined by the chromatin state at the co-enriched loci, and is dependent on the identity and activity of the binding proteins.

### **Co-enrichment during oxidative stress is reduced, not moved to other loci**

To directly compare co-enrichment between YPD and perturbed conditions, we looked at the hydrogen peroxide condition, which has the highest number of factors assayed in common with YPD. We then calculated MLFE in each condition using only the subset of factors that was assayed in both, and performed GO analysis (**Table 6**) and expression correlation analysis (**Figure 7**). Analyzing this subset, we again found the strongest co-enrichment at promoters of ribosome-associated genes, in both YPD and hydrogen peroxide conditions (**Table 6**). However, the enrichment was greatly reduced during oxidative stress, to the extent that only one GO category (small ribosomal subunit; see highlighted row) in the H<sub>2</sub>O<sub>2</sub> condition showed an enrichment surpassing a threshold of  $p < (0.05/748 \text{ categories})$ . In addition, the correlation between co-enrichment and expression is much weaker during oxidative stress (YPD  $r = 0.17$ , slope =  $0.02 \pm 0.002$ ,  $p = 1.37 \times 10^{-35}$ ; H<sub>2</sub>O<sub>2</sub>  $r = 0.05$ , slope =  $.005 \pm 0.001$ ,  $p = 3.1 \times 10^{-4}$ ).

### **Validation by ChIP-Seq**

For validation purposes, we compared three Ste12p ChIP-Seq datasets, one of which was performed in pseudohyphal conditions and two in exposure to alpha mating factor [32-33]. Both showed enrichment near ncRNA genes, although the magnitude was greater during exposure to alpha mating factor, consistent with the experiments of Harbison et al. [11] (**Figure 8**). These data further support that the hotspot effect is not an artifact of microarray technology.

## DISCUSSION

### **Other evidence for TF colocalization in the yeast literature**

Our reanalysis of the ChIP-chip compendia of Lee *et al.* [12] and Harbison *et al.* [11] has revealed co-enrichment of yeast TFs at ncRNA genes. In a more recent study, Venters and colleagues used low-density tiling microarrays to assay the occupancy of a broader range of factors [13]. Because of differences in probe design, their occupancy data are not directly comparable to those of Lee *et al.* [12] and Harbison *et al.* [11], and are not suited to the interrogation of transcribed regions; however, the authors noted a surprising association of Pol II-associated factors with tRNA promoters. Two recent studies in yeast have recognized non-canonical binding in light of the known biological roles of TFs. Fan and Struhl [34] found condition-specific Mediator binding over many gene bodies, rather than upstream promoter regions where it is known to act; they argued based on the low enrichment and reproducibility that these targets represent indirect binding due to chromatin state. Teytelman and colleagues [35], motivated by finding components of the Sir silencing complex at actively-transcribed regions, found that exogenously expressed GFP also immunoprecipitated with these regions in a condition-specific manner.

### **Possible mechanisms underlying dynamic co-enrichment at ncRNA genes**

Genomic recruitment of transcription factors is usually conceptualized as binding of the DNA-binding domain of the protein to high-affinity consensus sequences in the DNA, contingent on the local accessibility of the DNA. Our finding that many studied yeast transcription factors preferentially immunoprecipitate with nucleosome-depleted DNA is consistent with previous observations that TFs will nonspecifically bind to naked DNA at a low level [36]. Within the nucleus, nucleosome-depleted regions may most closely resemble naked DNA *in vitro*, in which case they ought to display a higher level of nonspecific binding relative to nucleosome-occupied and heterochromatic regions. However, we have shown here that the hotspot phenomenon can only be partly explained in terms of chromatin accessibility, because even when using the same antibody, the ChIP enrichment at hotspots depends on which TF carries the affinity tag. This is consistent with the recent observation in fly Kc cells [37] and in cultured human cells [38] that the optimal chromatin context – i.e., the chromatin type for which the highest degree of occupancy is observed at a given level of sequence-predicted DNA binding affinity – is different for each TF, and that none of the chromatin states is globally permissive.

Both the ChIP and DamID method can detect TFs that are near DNA but not necessarily contacting it. Consequently, the observed co-enrichment signal could be due to the proximity of probed regions to the TFs rather than due to direct interactions with them. Indeed, for individual yeast TFs, indirect interactions have been proposed in order to account for the poor correlation between *in vitro* sequence specificity as measured by protein binding microarrays (PBMs) and *in vivo* occupancy as measured by ChIP-chip [39]. Fly and mouse hotspots have been hypothesized to reflect both direct interactions mediated by the DNA-binding domain of certain TFs and indirect, protein-protein interactions involving the other co-enriched TFs [1, 7]. Our sequence analysis does not provide any evidence of direct sequence-specific interactions with TFs. Nucleosome depletion and proximity to ncRNA genes both predict co-enrichment significantly better than local regional binding affinity predicted from DNA sequences using either known binding specificities or *de novo* motif discovery. The co-enrichment could also be the result of competitive binding by different TFs in different subsets of cells and at different times, as has been suggested by recent work [40-41].

Several lines of cytological evidence from mammalian cells suggest that transcription by polymerase II occurs at nuclear foci comprising many polymerase molecules and transcription factors, termed “transcription factories” [9]. If such factories exist in yeast, it is conceivable that nucleosome-free regions and ncRNA genes – which are associated with high levels of transcription (by polymerase II and I/III, respectively) – are in close proximity to multiple TFs as a result of transcription factories. Indeed, it was recently discovered that Pol II-associated transcription factors tightly associate with Pol III-transcribed genes in human cells [42].

## CONCLUSIONS

Our results show that the median enrichment across all TFs is far more predictive of the ChIP landscape of a typical individual yeast TF than DNA sequence is. This agrees with a recent study of the interaction between chromatin accessibility and sequence specificity [10]. While the normalized enrichment data of the original yeast ChIP-chip compendia [11-12] have proven immensely valuable for understanding and modeling regulatory networks, any other ChIP experiment not subjected to the same normalization will display both sequence-specific as well as hotspot targeting.

As genomic protein occupancy mapping technology increases in resolution and sensitivity, understanding the structure, origin, and possible function of co-enrichment hotspots will become increasingly important to interpreting the data they generate.

## METHODS

### Processing of raw ChIP-chip data

The original raw ChIP-chip data [11-12] were obtained from ArrayExpress (<http://www.ebi.ac.uk/microarray-as/ae/>) using accession numbers E-WMIT-1 and E-WMIT-10, respectively. Protocol information for each array (which dye was IP vs. WCE, experimental conditions, etc.) was extracted from the files E-WMIT-1.sdrf.txt and E-WMIT-10.sdrf.txt, available in the directory <http://www.ebi.ac.uk/microarray-as/ae/download/>. Raw intensity information was downloaded from the tab-delimited text files in E-WMIT-1.raw.zip and E-WMIT-10.raw.zip available in the FTP directory specified within the aforementioned text files. The column headers in all of these text files were found to be corrupted. Therefore, they were split between nine different formats. Each format was manually curated to locate the correct median foreground and background red and green intensity columns, using the presence of a background-subtracted log ratio column as a validation. Four of the experimental conditions had array data in the database that also had corrupted rows, where the number of columns was not consistent throughout the whole file; data associated with these conditions (Dal81p sulfometuron methyl, Arg80p sulfometuron methyl, Mac1p hydrogen peroxide, and Ime1 hydrogen peroxide) were discarded. Raw intensities were loaded into *R* and Loess normalization was performed on each array (to account for dye-specific response functions) using the `normalizeWithinArrays` function of the *limma* package [43], resulting in an *M* (relative intensity) and *A* (absolute intensity) value for each spot on each array. A number of the arrays were found to have very low variance in their log ratios; arrays with a variance in *M* after Loess normalization less than 0.05 were discarded. Four summary values were calculated for each probe: a median log ratio (*M*) and intensity (*A*) signal across all rich-media (YPD) arrays, and a median log ratio (*M*) and intensity (*A*) across all stress arrays. Additionally, for every experimental condition for which multiple replicates were available, a median *M* and *A* value across replicates was calculated. The same processing was applied to ArrayExpress data from assaying rabbit IgG control, no-antibody control, and kinase occupancy by tiling array [23, 27], which we used for validation.

### Genome annotation

The genomic coordinates of probes were mapped to the chromosome sequences contained in the GFF-formatted sequence and annotation available from the

Saccharomyces Genome Database (SGD) [44], dated 21 April 2007, and the distance from each probe to the nearest annotated genomic feature of each type was calculated. More specifically, both a gap (defined as zero if overlapping, and otherwise the distance between the edge of a probe and the edge of a feature) and an overlap were calculated. The GFF file was further parsed to divide tRNAs into spliced vs. intronless and *Ty*-flanked vs. *Ty*-absent tRNAs, and to divide snoRNAs into H/ACA-box vs. C/D-box and intron-derived vs. extragenic snoRNAs. The array design includes both probes that are centered on tRNAs, and probes that only overlap partially with tRNAs. For each category of genomic feature, we defined the probes that were centered on the feature (“high overlap” > 25 bp), those with a partial overlap (“low overlap” ≤ 25 bp), those that were neighboring (“neighbors,” no overlap, gap between 1 and 100 bp), and all other probes.

### **Annotation-specific inspection of intensities to test for cross-hybridization**

In order to test for cross-hybridization, we inspected median intensities and performed *t*-tests for probes corresponding to each class and sub-class of features defined above (**Table 3**). While probes corresponding to telomeres had higher median log<sub>2</sub> fold enrichment (MLFE;  $\Delta\text{MLFE} = 0.41$ ,  $p = 8.1 \times 10^{-5}$ ), they also had higher median intensities ( $\Delta\bar{A} = 2.23$ ,  $p = 1.8 \times 10^{-4}$ ). Therefore, we excluded them from our analysis. Additionally, many families of ncRNA probes had *lower* median intensities, presumably due to their relatively short length. Using a conservative criterion for classification (**Table 3D**), discarding probes overlapping ncRNA genes and only considering neighboring probes, still results in the co-occupancy effect among the neighboring probes, suggesting that neither the high copy number of tRNAs nor of their associated *Ty* elements are responsible for the co-occupancy effect. We settled on a criterion that excludes any probes showing any overlap with telomeres or high overlap with ncRNA genes from the remainder of our analyses, but we did include probes neighboring ncRNA genes and those with a low overlap with ncRNA genes in our definition of ncRNA gene probes (the criterion used in **Table 3C**). A similar criterion was employed in a RNA polymerase III location study using a similar ChIP-chip array design [45].

### **Comparison of occupancy at annotated targets and at ncRNA genes**

Annotated targets for each TF were defined as probes that overlapped or were neighboring (within 100 bp of) regions reported by Maclsaac et al. [46] within their *p*-value threshold of 0.005. After discarding probes that were annotated both as ncRNA

probes (according to the criterion described above) and as TF targets, we compared the mean  $\log_2$  fold enrichment among ncRNA probes and among annotated targets with that of all other probes. A significant difference in means was defined as a *t*-test passing a *p*-value threshold of 0.05, Bonferroni corrected for the number of tests.

### **Correlation with sequence-predicted binding affinity, nucleosome affinity, and gene expression**

The affinity of each probed region for TFs was calculated using two published libraries of protein binding microarray (PBM)-derived position weight matrices (PWMs) [28-29]. The PWMs were converted to position-specific affinity matrices (PSAMs) and probe-TF affinities were calculated using the *AffinityProfile* utility in the *MatrixREDUCE* package as described previously [47]. The Pearson correlation between predicted affinity and MFE was then calculated. Nucleosome occupancy measurements by ChIP-chip were obtained from Bernstein et al. [31]. For each probed region, the median log ratio across all assayed histone subunits was used. The Pearson correlation between predicted affinity and nucleosome occupancy was then calculated. Gene expression data from both YPD and the 30 minutes treatment with 0.4mM concentration H<sub>2</sub>O<sub>2</sub> condition were obtained from [48], and probes were assigned to genes using *S. cerevisiae* chromosomal features (Genome Version R64-1-1) annotated in Saccharomyces genome database (SGD). In cases of divergent promoters, value was assigned to both genes. Probe intensities were quantile normalized using MATLAB bioinformatics toolbox.

### **Gene Ontology analysis**

Functional enrichment of probes by Gene Ontology (GO) categories [49] was determined using a MATLAB implementation of the T-profiler algorithm [50]. The GO annotation was downloaded from SGD (Gene Ontology Consortium Validation Date: 01/25/2014).

### **Condition specific analyses**

Condition specificity was calculated as follows: For each YPD experiment, we calculated the Pearson correlation between the TF's occupancy and the median occupancy across all other rich media TF experiments, and also the correlation between its occupancy and its predicted affinity as predicted from PBM data. TFs for which no PBM-derived matrix was available were excluded. In cases for which two matrices were available – from both Badis et al. [28] and Zhu et al. [29] – the one with the best correlation to the ChIP occupancy was used.

## ChIP-seq analysis

ChIP-seq data from Lefrancois et al. [32] and Zheng et al. [33] were downloaded from Gene Expression Omnibus (<http://www.ncbi.nlm.nih.gov/geo>). These data include mapped peaks, but not genome-wide mapping of reads; therefore, read alignment results from ELAND were downloaded and processed using MACS [50] as described by the authors in order to obtain a genome-wide landscape of binding, in 10-bp bins. Distances from these bins to ncRNA genes were measured using the SGD genome annotation described above and BEDTools [51].

## ABBREVIATIONS

|       |                                              |
|-------|----------------------------------------------|
| ChIP  | chromatin immunoprecipitation                |
| DamID | DNA adenine methyltransferase identification |
| DBD   | DNA-binding domain                           |
| IgG   | immunoglobulin G                             |
| LFE   | $\log_2$ fold enrichment                     |
| HOT   | high-occupancy target                        |
| MLFE  | median $\log_2$ fold enrichment              |
| ncRNA | noncoding RNA                                |
| PBM   | protein-binding microarray                   |
| RP    | ribosomal protein                            |
| TF    | transcription factor                         |
| YPD   | yeast extract peptone dextrose               |

## COMPETING INTERESTS

The authors declare that they have no competing interests.



## **AUTHOR CONTRIBUTIONS**

The authors declare no conflicts of interest. LDW, JW, and HJB designed and performed research; LDW and HJB wrote the paper.

## **ACKNOWLEDGEMENTS**

We thank Bas van Steensel, Helen Causton, and members of the Bussemaker, Botstein, and Kellis labs for helpful discussions. This work was supported by Human Frontier Science Program (HFSP) grant RGP56/2003, National Institutes of Health (NIH) grants R01HG003008, U54CA121852, and T32GM082797, and P50GM071508, as well as a John Simon Guggenheim Foundation Fellowship to H.J.B.

## REFERENCES

1. Moorman C, Sun LV, Wang J, de Wit E, Talhout W, Ward LD, Greil F, Lu X-J, White KP, Bussemaker HJ *et al*: **Hotspots of transcription factor colocalization in the genome of *Drosophila melanogaster***. *Proc Natl Acad Sci U S A* 2006, **103**(32):12027-12032.
2. Yip KY, Cheng C, Bhardwaj N, Brown JB, Leng J, Kundaje A, Rozowsky J, Birney E, Bickel P, Snyder M *et al*: **Classification of human genomic regions based on experimentally determined binding sites of more than 100 transcription-related factors**. *Genome Biol* 2012, **13**(9):R48.
3. MacArthur S, Li XY, Li J, Brown JB, Chu HC, Zeng L, Grondona BP, Hechmer A, Simirenko L, Keranen SV *et al*: **Developmental roles of 21 *Drosophila* transcription factors are determined by quantitative differences in binding to an overlapping set of thousands of genomic regions**. *Genome Biol* 2009, **10**(7):R80.
4. Li X-y, MacArthur S, Bourgon R, Nix D, Pollard DA, Iyer VN, Hechmer A, Simirenko L, Stapleton M, Hendriks CLL *et al*: **Transcription factors bind thousands of active and inactive regions in the *Drosophila* blastoderm**. *PLoS Biol* 2008, **6**(2):e27.
5. Roy S, Ernst J, Kharchenko PV, Kheradpour P, Negre N, Eaton ML, Landolin JM, Bristow CA, Ma L, Lin MF *et al*: **Identification of functional elements and regulatory circuits by *Drosophila* modENCODE**. *Science* 2010, **330**(6012):1787-1797.
6. Gerstein MB, Lu ZJ, Van Nostrand EL, Cheng C, Arshinoff BI, Liu T, Yip KY, Robilotto R, Rechtsteiner A, Ikegami K *et al*: **Integrative analysis of the *Caenorhabditis elegans* genome by the modENCODE project**. *Science* 2010, **330**(6012):1775-1787.
7. Chen X, Xu H, Yuan P, Fang F, Huss M, Vega VB, Wong E, Orlov YL, Zhang W, Jiang J *et al*: **Integration of external signaling pathways with the core transcriptional network in embryonic stem cells**. *Cell* 2008, **133**(6):1106-1117.
8. Consortium EP, Dunham I, Kundaje A, Aldred SF, Collins PJ, Davis CA, Doyle F, Epstein CB, Frietze S, Harrow J *et al*: **An integrated encyclopedia of DNA elements in the human genome**. *Nature* 2012, **489**(7414):57-74.
9. Sutherland H, Bickmore WA: **Transcription factories: gene expression in unions?** *Nat Rev Genet* 2009, **10**(7):457-466.
10. Lowe CB, Kellis M, Siepel A, Raney BJ, Clamp M, Salama SR, Kingsley DM, Lindblad-Toh K, Haussler D: **Three periods of regulatory innovation during vertebrate evolution**. *Science* 2011, **333**(6045):1019-1024.
11. Harbison CT, Gordon DB, Lee TI, Rinaldi NJ, Macisaac KD, Danford TW, Hannett NM, Tagne JB, Reynolds DB, Yoo J *et al*: **Transcriptional regulatory code of a eukaryotic genome**. *Nature* 2004, **431**(7004):99-104.
12. Lee TI, Rinaldi NJ, Robert F, Odom DT, Bar-Joseph Z, Gerber GK, Hannett NM, Harbison CT, Thompson CM, Simon I *et al*: **Transcriptional regulatory networks in *Saccharomyces cerevisiae***. *Science* 2002, **298**(5594):799-804.
13. Venters BJ, Wachi S, Mavrich TN, Andersen BE, Jena P, Sinnamon AJ, Jain P, Roller NS, Jiang C, Hemeryck-Walsh C *et al*: **A comprehensive genomic binding map of gene and chromatin regulatory proteins in *Saccharomyces***. *Mol Cell* 2011, **41**(4):480-492.

14. Duan Z, Andronescu M, Schutz K, McIlwain S, Kim YJ, Lee C, Shendure J, Fields S, Blau CA, Noble WS: **A three-dimensional model of the yeast genome.** *Nature* 2010, **465**(7296):363-367.
15. Szostak JW, Blackburn EH: **Cloning yeast telomeres on linear plasmid vectors.** *Cell* 1982, **29**(1):245-255.
16. Kim JM, Vanguri S, Boeke JD, Gabriel A, Voytas DF: **Transposable elements and genome organization: a comprehensive survey of retrotransposons revealed by the complete *Saccharomyces cerevisiae* genome sequence.** *Genome Res* 1998, **8**(5):464-478.
17. Kane MD, Jatkoa TA, Stumpf CR, Lu J, Thomas JD, Madore SJ: **Assessment of the sensitivity and specificity of oligonucleotide (50mer) microarrays.** *Nucleic Acids Res* 2000, **28**(22):4552-4557.
18. Evertsz EM, Au-Young J, Ruvolo MV, Lim AC, Reynolds MA: **Hybridization cross-reactivity within homologous gene families on glass cDNA microarrays.** *Biotechniques* 2001, **31**(5):1182, 1184, 1186 passim.
19. Buck MJ, Lieb JD: **ChIP-chip: considerations for the design, analysis, and application of genome-wide chromatin immunoprecipitation experiments.** *Genomics* 2004, **83**(3):349-360.
20. Orian A, van Steensel B, Delrow J, Bussemaker HJ, Li L, Sawado T, Williams E, Loo LW, Cowley SM, Yost C *et al*: **Genomic binding by the *Drosophila* Myc, Max, Mad/Mnt transcription factor network.** *Genes Dev* 2003, **17**(9):1101-1114.
21. Teytelman L, Ozaydin B, Zill O, Lefrancois P, Snyder M, Rine J, Eisen MB: **Impact of chromatin structures on DNA processing for genomic analyses.** *PLoS One* 2009, **4**(8):e6700.
22. Auerbach RK, Euskirchen G, Rozowsky J, Lamarre-Vincent N, Moqtaderi Z, Lefrancois P, Struhl K, Gerstein M, Snyder M: **Mapping accessible chromatin regions using Sono-Seq.** *Proc Natl Acad Sci U S A* 2009, **106**(35):14926-14931.
23. Pokholok DK, Harbison CT, Levine S, Cole M, Hannett NM, Lee TI, Bell GW, Walker K, Rolfe PA, Herbolsheimer E *et al*: **Genome-wide map of nucleosome acetylation and methylation in yeast.** *Cell* 2005, **122**(4):517-527.
24. Arabi A, Wu S, Ridderstråle K, Bierhoff H, Shiue C, Fatyol K, Fahlén S, Hydring P, Söderberg O, Grummt I *et al*: **c-Myc associates with ribosomal DNA and activates RNA polymerase I transcription.** *Nat Cell Biol* 2005, **7**(3):303-310.
25. Thompson M, Haeusler RA, Good PD, Engelke DR: **Nucleolar clustering of dispersed tRNA genes.** *Science* 2003, **302**(5649):1399-1401.
26. Haeusler RA, Pratt-Hyatt M, Good PD, Gipson TA, Engelke DR: **Clustering of yeast tRNA genes is mediated by specific association of condensin with tRNA gene transcription complexes.** *Genes Dev* 2008, **22**(16):2204-2214.
27. Pokholok DK, Zeitlinger J, Hannett NM, Reynolds DB, Young RA: **Activated signal transduction kinases frequently occupy target genes.** *Science* 2006, **313**(5786):533-536.
28. Badis G, Chan ET, van Bakel H, Pena-Castillo L, Tillo D, Tsui K, Carlson CD, Gossett AJ, Hasinoff MJ, Warren CL *et al*: **A library of yeast transcription factor motifs reveals a widespread function for Rsc3 in targeting nucleosome exclusion at promoters.** *Mol Cell* 2008, **32**(6):878-887.
29. Zhu C, Byers KJ, McCord RP, Shi Z, Berger MF, Newburger DE, Saulrieta K, Smith Z, Shah MV, Radhakrishnan M *et al*: **High-resolution DNA-binding specificity analysis of yeast transcription factors.** *Genome Res* 2009, **19**(4):556-566.

30. Warner JR: **The economics of ribosome biosynthesis in yeast.** *Trends Biochem Sci* 1999, **24**(11):437-440.
31. Bernstein BE, Liu CL, Humphrey EL, Perlstein EO, Schreiber SL: **Global nucleosome occupancy in yeast.** *Genome Biol* 2004, **5**(9):R62.
32. Lefrancois P, Euskirchen GM, Auerbach RK, Rozowsky J, Gibson T, Yellman CM, Gerstein M, Snyder M: **Efficient yeast ChIP-Seq using multiplex short-read DNA sequencing.** *BMC Genomics* 2009, **10**:37.
33. Zheng W, Zhao H, Mancera E, Steinmetz LM, Snyder M: **Genetic analysis of variation in transcription factor binding in yeast.** *Nature* 2010, **464**(7292):1187-1191.
34. Fan X, Struhl K: **Where does mediator bind in vivo?** *PLoS One* 2009, **4**(4):e5029.
35. Teytelman L, Thurtle DM, Rine J, van Oudenaarden A: **Highly expressed loci are vulnerable to misleading ChIP localization of multiple unrelated proteins.** *Proc Natl Acad Sci U S A* 2013, **110**(46):18602-18607.
36. von Hippel PH, Berg OG: **On the specificity of DNA-protein interactions.** *Proc Natl Acad Sci U S A* 1986, **83**(6):1608-1612.
37. Fillion GJ, van Bemmelen JG, Braunschweig U, Talhout W, Kind J, Ward LD, Brugman W, de Castro IJ, Kerkhoven RM, Bussemaker HJ *et al*: **Systematic protein location mapping reveals five principal chromatin types in Drosophila cells.** *Cell* 2010, **143**(2):212-224.
38. Ernst J, Kellis M: **Interplay between chromatin state, regulator binding, and regulatory motifs in six human cell types.** *Genome Res* 2013.
39. Gordan R, Hartemink AJ, Bulyk ML: **Distinguishing direct versus indirect transcription factor-DNA interactions.** *Genome Res* 2009.
40. Mason MJ, Plath K, Zhou Q: **Identification of context-dependent motifs by contrasting ChIP binding data.** *Bioinformatics* 2010, **26**(22):2826-2832.
41. Zhang X, Peterson KA, Liu XS, McMahon AP, Ohba S: **Gene regulatory networks mediating canonical wnt signal-directed control of pluripotency and differentiation in embryonic stem cells.** *Stem Cells* 2013, **31**(12):2667-2679.
42. Raha D, Wang Z, Moqtaderi Z, Wu L, Zhong G, Gerstein M, Struhl K, Snyder M: **Close association of RNA polymerase II and many transcription factors with Pol III genes.** *Proc Natl Acad Sci U S A* 2010, **107**(8):3639-3644.
43. Smyth GK, Speed T: **Normalization of cDNA microarray data.** *Methods* 2003, **31**(4):265-273.
44. Cherry JM, Adler C, Ball C, Chervitz SA, Dwight SS, Hester ET, Jia Y, Juvik G, Roe T, Schroeder M *et al*: **SGD: Saccharomyces Genome Database.** *Nucleic Acids Res* 1998, **26**(1):73-79.
45. Roberts DN, Stewart AJ, Huff JT, Cairns BR: **The RNA polymerase III transcriptome revealed by genome-wide localization and activity-occupancy relationships.** *Proc Natl Acad Sci U S A* 2003, **100**(25):14695-14700.
46. MacIsaac KD, Wang T, Gordon DB, Gifford DK, Stormo GD, Fraenkel E: **An improved map of conserved regulatory sites for Saccharomyces cerevisiae.** *BMC Bioinformatics* 2006, **7**:113.
47. Foat BC, Tepper RG, Bussemaker HJ: **TransfactomeDB: a resource for exploring the nucleotide sequence specificity and condition-specific regulatory activity of trans-acting factors.** *Nucleic Acids Res* 2008, **36**(Database issue):D125-131.
48. Huebert DJ, Kuan PF, Keles S, Gasch AP: **Dynamic changes in nucleosome occupancy are not predictive of gene expression dynamics but are linked to transcription and chromatin regulators.** *Mol Cell Biol* 2012, **32**(9):1645-1653.

49. Ashburner M, Ball CA, Blake JA, Botstein D, Butler H, Cherry JM, Davis AP, Dolinski K, Dwight SS, Eppig JT *et al*: **Gene ontology: tool for the unification of biology. The Gene Ontology Consortium.** *Nat Genet* 2000, **25**(1):25-29.
50. Zhang Y, Liu T, Meyer CA, Eeckhoute J, Johnson DS, Bernstein BE, Nusbaum C, Myers RM, Brown M, Li W *et al*: **Model-based analysis of ChIP-Seq (MACS).** *Genome Biol* 2008, **9**(9):R137.
51. Quinlan AR, Hall IM: **BEDTools: a flexible suite of utilities for comparing genomic features.** *Bioinformatics* 2010, **26**(6):841-842.

## TABLES

**Table 1 - Probes with highest median ChIP-chip fold-enrichment (FE) across rich media experiments.** List of probes with highest median ChIP-chip fold-enrichment (FE) across rich media experiments from Harbison et al. [11].

| Probe        | Median FE | Notable feature nearby?   | Distance (bp) |
|--------------|-----------|---------------------------|---------------|
| TEL6R        | 2.31      | telomere                  | overlap       |
| YCLCdelta1   | 2.14      | tRNA gene                 | 519           |
| TEL9L        | 2.08      | telomere*                 | *             |
| iYBR057C     | 1.87      |                           |               |
| iYNL338W     | 1.87      | telomere                  | overlap       |
| iYMR134W     | 1.86      |                           |               |
| SNR190       | 1.83      | snoRNA gene               | overlap       |
| iYDR543C     | 1.80      | telomere                  | overlap       |
| iYJR044C     | 1.78      |                           |               |
| IntYDR064W   | 1.76      | RP gene (RPS13)           | overlap       |
| iYHR091C     | 1.75      |                           |               |
| TEL3R        | 1.73      | telomere                  | overlap       |
| iYLL066C-1   | 1.71      | telomere                  | overlap       |
| iYJR144W     | 1.65      | RP gene (RPS4A)           | 99            |
| iYHR174W     | 1.64      |                           |               |
| IntYGL103W   | 1.63      | RP gene (RPL28)           | overlap       |
| snR128       | 1.63      | snoRNA gene               | overlap       |
| iYLL067C-1   | 1.62      | telomere*                 | *             |
| tW(CCA)P     | 1.62      | tRNA gene*                | *             |
| tL(CAA)N     | 1.61      | tRNA gene*                | *             |
| tL(CAA)C     | 1.60      | tRNA gene                 | overlap       |
| tK(UUU)P     | 1.60      | tRNA gene*                | *             |
| iYGR295C-1   | 1.57      | telomere*                 | *             |
| SNR70        | 1.57      | snoRNA gene               | overlap       |
| SNR55        | 1.57      | snoRNA gene               | overlap       |
| TEL15R-1     | 1.56      | telomere*                 | *             |
| LSR1         | 1.54      | snRNA gene                | overlap       |
| SNR57        | 1.54      | snoRNA gene               | overlap       |
| SNR4         | 1.52      | snoRNA gene               | overlap       |
| iYJL191W     | 1.49      | RP genes (RPS14B, RPS22A) | 10, 2         |
| tM(CAU)O2    | 1.49      | tRNA gene                 | overlap       |
| itL(GAG)G    | 1.48      | tRNA gene                 | overlap       |
| iYLR466W     | 1.48      | telomere*                 | *             |
| iYKRCdelta12 | 1.48      | tRNA gene                 | overlap       |
| iYOR235W     | 1.47      | snoRNA gene               | overlap       |
| iYOL109W     | 1.46      | tRNA gene                 | overlap       |
| iYJL149W     | 1.46      | snoRNA gene               | 8             |
| iYORCdelta11 | 1.46      | tRNA gene                 | overlap       |
| tL(UAG)L2    | 1.45      | tRNA gene*                | *             |
| ...          | ...       | ...                       | ...           |

\* Probe sequence does not map uniquely to the genome.

**Table 2 - Comparison of TF co-occupancy in each probe family vs. all other probes.** Probes were mapped to a feature if there was any overlap between the probe and feature. For each probe, the co-occupancy was defined as the median  $\log_2$  ChIP-chip fold enrichment (MFE) across all rich media experiments. For each feature, the probe family co-occupancy  $\Delta\bar{M}$  was defined as the difference in mean co-occupancy within each probe family and mean co-occupancy at all other probes. The  $p$ -value was determined using a t-test. Significant  $p$ -values are highlighted.

| Probe family/feature         | Family size | Family TF co-enrichment | $-\log_{10}(p)$ |
|------------------------------|-------------|-------------------------|-----------------|
| ncRNA                        | 514         | 0.27                    | 160.16          |
| tRNA                         | 391         | 0.26                    | 134.72          |
| snoRNA                       | 100         | 0.28                    | 27.40           |
| repeat region                | 369         | 0.07                    | 8.55            |
| intron                       | 106         | 0.12                    | 6.92            |
| telomere                     | 15          | 0.41                    | 4.09            |
| snRNA                        | 13          | 0.24                    | 3.45            |
| transposable element         | 53          | 0.08                    | 2.78            |
| ARS                          | 274         | -0.02                   | 1.79            |
| transposable element<br>gene | 6           | -0.05                   | 0.93            |
| rRNA                         | 4           | -0.12                   | 0.84            |
| pseudogene                   | 14          | 0.02                    | 0.21            |
| centromere                   | 24          | -0.01                   | 0.05            |

**Table 3 - Comparison of TF co-occupancy and absolute intensity among selected probe families and sub-families and different mapping criteria.** TF co-enrichment  $M$  was defined for each probe as the median  $\log_2$  fold enrichment across all rich media ChIP-chip experiments, and the family  $\Delta\bar{M}$  as the difference in mean  $M$  among probes in a family and all other probes. The  $p$ -value was calculated using a  $t$ -test. Similarly, the absolute intensity  $A$  for each probe in each experiment was defined as the mean (Lowess-normalized) intensity between the red and green channels; the median  $A$  was calculated across all experiments for each probe; and the family  $\Delta\bar{A}$  was reported as the difference in mean  $A$  among probes within a family and all other probes. Probe mapping and categories for comparison are as follows (see Methods for details of probe categorization): (A) Probes with high overlap vs. all other probes. (B) Probes with any overlap vs. all other probes. (C) Probes with low overlap or neighboring vs. non-neighboring probes (high overlap probes excluded from the analysis.) (D) Neighboring probes vs. non-neighboring probes (probes with any overlap excluded from the analysis.) Significant co-enrichment ( $\Delta\bar{M}$ )  $p$ -values are highlighted yellow; significant intensity ( $\Delta\bar{A}$ )  $p$ -values, which may signify cross-hybridization, are highlighted red.

**A**

|                         | n   | $\Delta\bar{M}$ | $-\log_{10}(p)$ | $\Delta\bar{A}$ | $-\log_{10}(p)$ |
|-------------------------|-----|-----------------|-----------------|-----------------|-----------------|
| ncRNA                   | 115 | 0.31            | 34.72           | -1.07           | 8.22            |
| tRNA                    | 33  | 0.37            | 16.37           | -1.99           | 9.59            |
| tRNA - spliced          | 5   | 0.46            | 2.90            | -0.92           | 2.02            |
| tRNA - unspliced        | 28  | 0.36            | 13.71           | -2.18           | 8.94            |
| tRNA - with Ty          | 18  | 0.40            | 9.60            | -1.81           | 5.36            |
| tRNA - without Ty       | 15  | 0.33            | 7.24            | -2.20           | 4.56            |
| snoRNA                  | 69  | 0.31            | 20.96           | -0.74           | 2.67            |
| snoRNA - C/D box        | 36  | 0.37            | 12.60           | -1.76           | 5.85            |
| snoRNA - H/ACA box      | 28  | 0.24            | 8.73            | 0.12            | 0.19            |
| snoRNA - unknown family | 5   | 0.25            | 1.34            | 1.81            | 2.43            |
| snoRNA - extragenic     | 66  | 0.30            | 19.44           | -0.67           | 2.20            |
| snoRNA - intron-derived | 3   | 0.41            | 2.24            | -2.19           | 1.25            |
| snRNA                   | 6   | 0.35            | 2.28            | -1.18           | 0.81            |
| telomere                | 12  | 0.49            | 4.04            | 2.19            | 2.67            |

**B**

|                   | n   | $\Delta\bar{M}$ | $-\log_{10}(p)$ | $\Delta\bar{A}$ | $-\log_{10}(p)$ |
|-------------------|-----|-----------------|-----------------|-----------------|-----------------|
| ncRNA             | 514 | 0.27            | 160.16          | -0.13           | 1.41            |
| tRNA              | 391 | 0.26            | 134.72          | -0.04           | 0.24            |
| tRNA - spliced    | 80  | 0.26            | 28.41           | 0.17            | 0.73            |
| tRNA - unspliced  | 312 | 0.26            | 103.57          | -0.08           | 0.56            |
| tRNA - with Ty    | 246 | 0.27            | 83.46           | -0.22           | 2.50            |
| tRNA - without Ty | 145 | 0.23            | 47.34           | 0.28            | 1.80            |



|                         |     |      |       |       |      |
|-------------------------|-----|------|-------|-------|------|
| snoRNA                  | 100 | 0.28 | 27.40 | -0.53 | 2.43 |
| snoRNA - C/D box        | 58  | 0.31 | 16.93 | -1.06 | 4.33 |
| snoRNA - H/ACA box      | 37  | 0.22 | 10.49 | 0     | 0    |
| snoRNA - unknown family | 5   | 0.25 | 1.34  | 1.81  | 2.43 |
| snoRNA - extragenic     | 95  | 0.27 | 25.13 | -0.50 | 2.12 |
| snoRNA - intron-derived | 5   | 0.35 | 3.05  | -1.04 | 0.61 |
| snRNA                   | 13  | 0.24 | 3.45  | -0.53 | 0.63 |
| telomere                | 15  | 0.41 | 4.09  | 2.23  | 3.74 |

**C**

|                         | n   | $\Delta\bar{M}$ | $-\log_{10}(p)$ | $\Delta\bar{A}$ | $-\log_{10}(p)$ |
|-------------------------|-----|-----------------|-----------------|-----------------|-----------------|
| ncRNA                   | 570 | 0.25            | 191.6           | 0.08            | 0.86            |
| tRNA                    | 500 | 0.25            | 172.62          | 0.07            | 0.66            |
| tRNA - spliced          | 115 | 0.25            | 38.53           | 0.04            | 0.13            |
| tRNA - unspliced        | 388 | 0.24            | 128.37          | 0.09            | 0.85            |
| tRNA - with Ty          | 324 | 0.25            | 108.91          | -0.17           | 2.06            |
| tRNA - without Ty       | 176 | 0.22            | 55.77           | 0.49            | 7.43            |
| snoRNA                  | 60  | 0.20            | 15.81           | 0.12            | 0.35            |
| snoRNA - C/D box        | 47  | 0.21            | 13.71           | 0.23            | 0.76            |
| snoRNA - H/ACA box      | 14  | 0.16            | 2.94            | -0.16           | 0.18            |
| snoRNA - unknown family | NA  | NA              | NA              | NA              | NA              |
| snoRNA - extragenic     | 58  | 0.20            | 14.87           | 0.10            | 0.27            |
| snoRNA - intron-derived | 2   | 0.27            | 1.10            | 0.68            | 1.40            |
| snRNA                   | 8   | 0.15            | 2.18            | -0.08           | 0.07            |
| telomere                | 4   | 0.10            | 1.43            | 1.96            | 1.46            |

**D**

|                         | n   | $\Delta\bar{M}$ | $-\log_{10}(p)$ | $\Delta\bar{A}$ | $-\log_{10}(p)$ |
|-------------------------|-----|-----------------|-----------------|-----------------|-----------------|
| ncRNA                   | 171 | 0.24            | 56.57           | -0.06           | 0.27            |
| tRNA                    | 142 | 0.24            | 46.65           | -0.12           | 0.61            |
| tRNA - spliced          | 40  | 0.25            | 11.91           | -0.34           | 1.13            |
| tRNA - unspliced        | 104 | 0.23            | 34.12           | -0.02           | 0.05            |
| tRNA - with Ty          | 96  | 0.24            | 30.84           | -0.32           | 1.98            |
| tRNA - without Ty       | 46  | 0.22            | 14.14           | 0.28            | 0.80            |
| snoRNA                  | 29  | 0.20            | 8.17            | 0.29            | 0.75            |
| snoRNA - C/D box        | 25  | 0.22            | 8.12            | 0.35            | 0.87            |
| snoRNA - H/ACA box      | 5   | 0.15            | 0.90            | 0.23            | 0.16            |
| snoRNA - unknown family | NA  | NA              | NA              | NA              | NA              |
| snoRNA - extragenic     | 29  | 0.20            | 8.16            | 0.29            | 0.75            |
| snoRNA - intron-derived | NA  | NA              | NA              | NA              | NA              |
| snRNA                   | NA  | NA              | NA              | NA              | NA              |
| telomere                | NA  | NA              | NA              | NA              | NA              |

**Table 4 - Gene Ontology (GO) enrichment analysis of genes by level of TF co-enrichment at neighboring probes.**

| <b>GO Category</b>                                | <b>p-value</b> | <b>t</b> |
|---------------------------------------------------|----------------|----------|
| 6414 P translational_elongation                   | 7.74E-43       | 13.84    |
| 2181 P cytoplasmic_translation                    | 1.11E-42       | 13.81    |
| 30533 F triplet_codon-amino_acid_adaptor_activity | 2.65E-38       | 13.04    |
| 3735 F structural_constituent_of_ribosome         | 9.10E-32       | 11.80    |
| 22625 C cytosolic_large_ribosomal_subunit         | 5.13E-31       | 11.65    |
| 5840 C ribosome                                   | 3.10E-25       | 10.43    |
| 6412 P translation                                | 1.04E-23       | 10.08    |
| 22627 C cytosolic_small_ribosomal_subunit         | 2.43E-21       | 9.52     |
| 943 C retrotransposon_nucleocapsid                | 4.54E-20       | 9.21     |
| 30529 C ribonucleoprotein_complex                 | 6.04E-20       | 9.18     |
| 32197 P transposition,_RNA-mediated               | 1.49E-19       | 9.08     |
| 5829 C cytosol                                    | 9.69E-17       | 8.34     |
| 5622 C intracellular                              | 9.59E-13       | 7.15     |
| 15074 P DNA_integration                           | 1.66E-09       | 6.04     |
| 46797 P viral_procapsid_maturation                | 1.66E-09       | 6.04     |
| 3964 F RNA-directed_DNA_polymerase_activity       | 8.01E-09       | 5.78     |
| 3723 F RNA_binding                                | 1.55E-08       | 5.66     |
| 4523 F RNA-DNA_hybrid_ribonuclease_activity       | 3.14E-08       | 5.54     |
| 4540 F ribonuclease_activity                      | 5.65E-08       | 5.44     |

**Table 5 - Comparison of TF co-enrichment for ncRNA families in rich media**

**and stress conditions.** Criterion for probe mapping is the same as in Table 3C:

Probes with low overlap or neighboring vs. non-neighboring probes (high overlap probes excluded from the analysis.) Significant  $p$ -values are highlighted in yellow.

|                         | n   | $\Delta\bar{M}$ (YPD) | $-\log_{10}(p)$ | $\Delta\bar{M}$ (stress) | $-\log_{10}(p)$ |
|-------------------------|-----|-----------------------|-----------------|--------------------------|-----------------|
| ncRNA                   | 570 | 0.25                  | 191.6           | 0.03                     | 5.92            |
| tRNA                    | 500 | 0.25                  | 172.62          | 0.03                     | 5.51            |
| tRNA - spliced          | 115 | 0.25                  | 38.53           | 0.05                     | 3.18            |
| tRNA - unspliced        | 388 | 0.24                  | 128.37          | 0.03                     | 3.07            |
| tRNA - with Ty          | 324 | 0.25                  | 108.91          | 0.03                     | 2.73            |
| tRNA - without Ty       | 176 | 0.22                  | 55.77           | 0.03                     | 2.92            |
| snoRNA                  | 60  | 0.2                   | 15.81           | 0.01                     | 0.15            |
| snoRNA - C/D box        | 47  | 0.21                  | 13.71           | 0.01                     | 0.11            |
| snoRNA - H/ACA box      | 14  | 0.16                  | 2.94            | 0.01                     | 0.09            |
| snoRNA - extragenic     | 58  | 0.2                   | 14.87           | 0.01                     | 0.17            |
| snoRNA - intron-derived | 2   | 0.27                  | 1.1             | -0.03                    | 0.19            |
| snRNA                   | 8   | 0.15                  | 2.18            | -0.08                    | 1.15            |

**Table 6 - Gene Ontology (GO) enrichment analysis of genes by level of TF co-enrichment in both YPD and H<sub>2</sub>O<sub>2</sub> conditions at neighboring probes.** TFs in this analysis were restricted to the subset shared between YPD and H<sub>2</sub>O<sub>2</sub> conditions, and the top GO enrichments are shown for YPD. The highlighted row is the only category that is significant in H<sub>2</sub>O<sub>2</sub> after Bonferroni correction. Expression values were obtained from Huebert and Gasch (2012) as described in Methods.

|                                                   | YPD p           | YPD t       | H <sub>2</sub> O <sub>2</sub> p | H <sub>2</sub> O <sub>2</sub> t |
|---------------------------------------------------|-----------------|-------------|---------------------------------|---------------------------------|
| 2181 P cytoplasmic_translation                    | 2.12E-38        | 13.06       | 2.65E-03                        | 3.01                            |
| 3735 F structural_constituent_of_ribosome         | 3.14E-31        | 11.69       | 1.03E-02                        | 2.57                            |
| 22625 C cytosolic_large_ribosomal_subunit         | 6.66E-30        | 11.43       | 4.30E-02                        | 2.02                            |
| 5840 C ribosome                                   | 2.91E-27        | 10.87       | 1.20E-03                        | 3.24                            |
| 6414 P translational_elongation                   | 4.76E-24        | 10.16       | 1.45E-01                        | 1.46                            |
| 6412 P translation                                | 1.22E-23        | 10.07       | 5.46E-02                        | 1.92                            |
| 22627 C cytosolic_small_ribosomal_subunit         | 4.76E-21        | 9.45        | 1.03E-03                        | 3.28                            |
| 30533 F triplet_codon-amino_acid_adaptor_activity | 2.24E-19        | 9.03        | 1.24E-01                        | 1.54                            |
| 30529 C ribonucleoprotein_complex                 | 9.82E-19        | 8.87        | 1.47E-01                        | 1.45                            |
| 5622 C intracellular                              | 5.83E-15        | 7.83        | 1.35E-01                        | 1.49                            |
| 943 C retrotransposon_nucleocapsid                | 3.35E-13        | 7.30        | 9.80E-03                        | 2.58                            |
| 32197 P transposition,_RNA-mediated               | 4.83E-13        | 7.25        | 1.21E-02                        | 2.51                            |
| 5829 C cytosol                                    | 4.27E-10        | 6.26        | 3.19E-02                        | 2.15                            |
| 6407 P rRNA_export_from_nucleus                   | 8.68E-09        | 5.76        | 8.69E-03                        | 2.62                            |
| <b>15935 C small_ribosomal_subunit</b>            | <b>2.54E-07</b> | <b>5.16</b> | <b>9.64E-05</b>                 | <b>3.90</b>                     |
| 15074 P DNA_integration                           | 3.34E-06        | 4.65        | 1.62E-01                        | 1.40                            |
| 46797 P viral_procapsid_maturation                | 3.34E-06        | 4.65        | 1.62E-01                        | 1.40                            |
| 4540 F ribonuclease_activity                      | 9.62E-06        | 4.43        | 2.95E-01                        | 1.05                            |
| 3964 F RNA-directed_DNA_polymerase_activity       | 1.14E-05        | 4.39        | 2.56E-01                        | 1.14                            |

## FIGURE CAPTIONS

### Figure 1 - ChIP co-enrichment

Distribution of TF ChIP co-enrichment across probes. Co-enrichment is quantified as median  $\log_2$  fold enrichment (MLFE) across all analyzed rich media experiments from Harbison et al. [11]. The distribution of the original normalized published data is in gray, and the distribution of the reanalyzed data is in red.

### Figure 2 - ChIP enrichment profiles from published and reanalyzed data

ChIP-chip enrichment profiles across all analyzed rich media experiments and correlations among them. An enrichment profile heatmap and correlatogram is shown for both the original normalized published data of Harbison et al. [11] and our reanalysis. TFs in all four matrices were sorted by their enrichment at ncRNA genes in the reanalyzed data; probes in the heatmaps were sorted by their median  $\log_2$  fold enrichment (MLFE) in the reanalyzed data.

### Figure 3 - ChIP co-enrichment at ncRNA genes

TF co-enrichment, defined as the median  $\log_2$  ChIP-chip fold enrichment (MLFE), as a function of distance to the nearest ncRNA gene. Plotted in black is a fit to  $y = b_0 + b_1 e^{(1/d)}$ . Top to bottom: (A) Co-enrichment across YPD experiments from Harbison et al. [11]:  $b_0 = -0.03$ ,  $b_1 = 0.44$ ,  $d = 316.8$ ;  $p$  for each parameter  $< 2 \times 10^{-16}$ ;  $r^2 = 0.27$ . (B) Co-enrichment across non-YPD experiments from Harbison et al. [11]:  $b_0 = -0.004$ ,  $b_1 = 0.09$ ,  $d = 154.3$ ;  $p$  for each parameter  $> 0.04$ ;  $r^2 = 0.004$ . (C) Co-enrichment across YPD experiments from Pokholok et al. [27]:  $b_0 = -0.01$ ,  $b_1 = 0.67$ ,  $d = 148.4$ ;  $p$  for each parameter  $< 2 \times 10^{-16}$ ;  $r^2 = 0.04$ . (D) ChIP-chip  $\log_2$  fold enrichment for no-antibody control from Pokholok et al. [23]:  $b_0 = -0.008$ ,  $b_1 = -0.13$ ,  $d = 504.2$ ;  $p$  for each parameter  $< 4.4 \times 10^{-10}$ ;  $r^2 = 0.004$ . (E) ChIP-chip  $\log_2$  fold enrichment for anti-rabbit IgG control from Pokholok et al. [23]:  $b_0 = -0.02$ ,  $b_1 = -0.15$ ,  $d = 417.1$ ;  $p$  for each parameter  $< 4.9 \times 10^{-8}$ ;  $r^2 = 0.004$ .

### Figure 4 - Correlation of ChIP enrichment for individual factors with co-enrichment and predicted affinity

Left to right: (A) Shared enrichment for each factor measured as the Pearson correlation between the TF's genomewide enrichment landscape (in terms of  $\log_2$

fold enrichment) and the median  $\log_2$  fold enrichment (MLFE) across all other rich media ChIP-chip experiments. (B) Sequence-specific enrichment for each factor measured as the Pearson correlation between the TF's genomewide enrichment and the predicted genomewide affinity for that TF from the PBM data of either Badis et al. [28] or Zhu et al. [29] (stronger correlation shown when TF is in both datasets). (C) Scatter plots showing the correlations described above (ChIP enrichment vs. co-enrichment and ChIP enrichment vs. affinity) for each of four factors: Met31p, Reb1p, Abf1p, and Yap1p.

**Figure 5 - Correlation of TF co-enrichment with gene expression and nucleosome occupancy.**

(L) Scatter plot of TF co-enrichment vs. gene expression in YPD from Huebert and Gasch [48]. Each point is the expression level for a gene and the co-enrichment (MLFE) of neighboring regions; expression values are  $\log_2$  of quantile normalized intensity values. Plotted as a black line is a fit of all the data to a linear model ( $r = 0.17$ ). (R) Scatter plot of TF co-enrichment vs. nucleosome occupancy by nucleosome ChIP from Bernstein et al. [31]. Each point is a probed region assayed both by Harbison et al. and Bernstein et al. Plotted as a line is a fit of all the data to a linear model ( $r = -0.31$ ).

**Figure 6 - Condition specificity of co-enrichment at ncRNA genes**

(A) Each row is a TF, and experimental conditions for that TF are plotted on the same row with letters indicating the condition. Conditions are: "Y", rich media; "S", sulfometuron methyl; "R", rapamycin; "H", hydrogen peroxide; "1", 1-butanol; "A", succinic acid; "G", galactose; "V", vitamin deprived medium; "M", alpha mating factor; "F", raffinose; and "P", phosphate deprived medium. ChIP enrichment at ncRNA genes is expressed as the difference between the mean  $\log_2$  fold enrichment of ncRNA gene probes and the mean  $\log_2$  fold enrichment of all other probes. (B) Leu3p, Ste12p, and Mot3p enrichment at ncRNA genes in rich media vs. sulfometuron methyl treatment. For each factor and condition, an empirical cumulative distribution function is shown contrasting the distribution in  $\log_2$  fold enrichment (FE) for ncRNA gene probes and all other probes.

**Figure 7 - Correlation of TF co-enrichment with gene expression in different conditions.**

Scatter plots of TF co-enrichment vs. gene expression in YPD from Huebert and Gasch [48]. In each case, the co-enrichment (MLFE) is defined by using only data from TFs assayed in both YPD and H<sub>2</sub>O<sub>2</sub>. Each point is the expression level for a gene and the co-enrichment (MLFE) of neighboring regions; expression values are log<sub>2</sub> of quantile normalized intensity values. (L) YPD, (R) H<sub>2</sub>O<sub>2</sub>.

### **Figure 8 - Validation using ChIP-Seq data**

Density of Ste12p ChIP-seq reads relative to the genome-wide coverage for the two parents tested under exposure to alpha mating factor in Zheng et al [33] and the strain tested under pseudohyphal growth conditions in Lefrancois et al. [32].

**Figure 1**

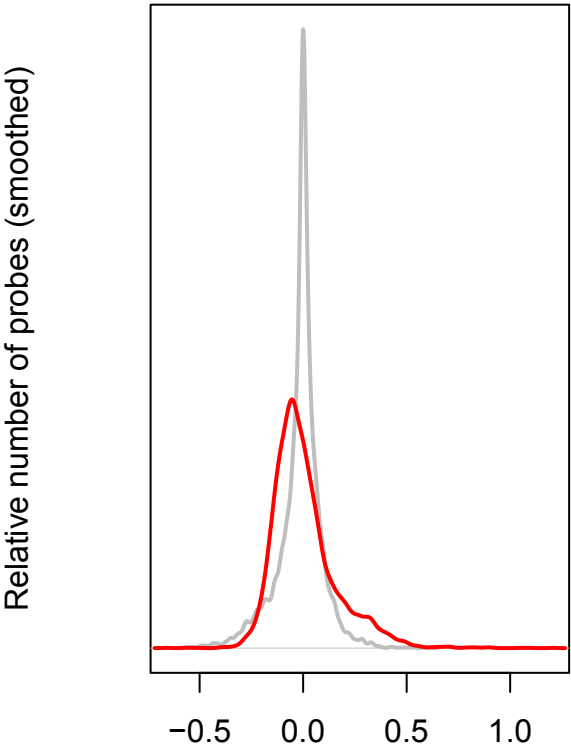

Median log<sub>2</sub> fold-enrichment across rich media ChIP experiments (MLFE)



Figure 2

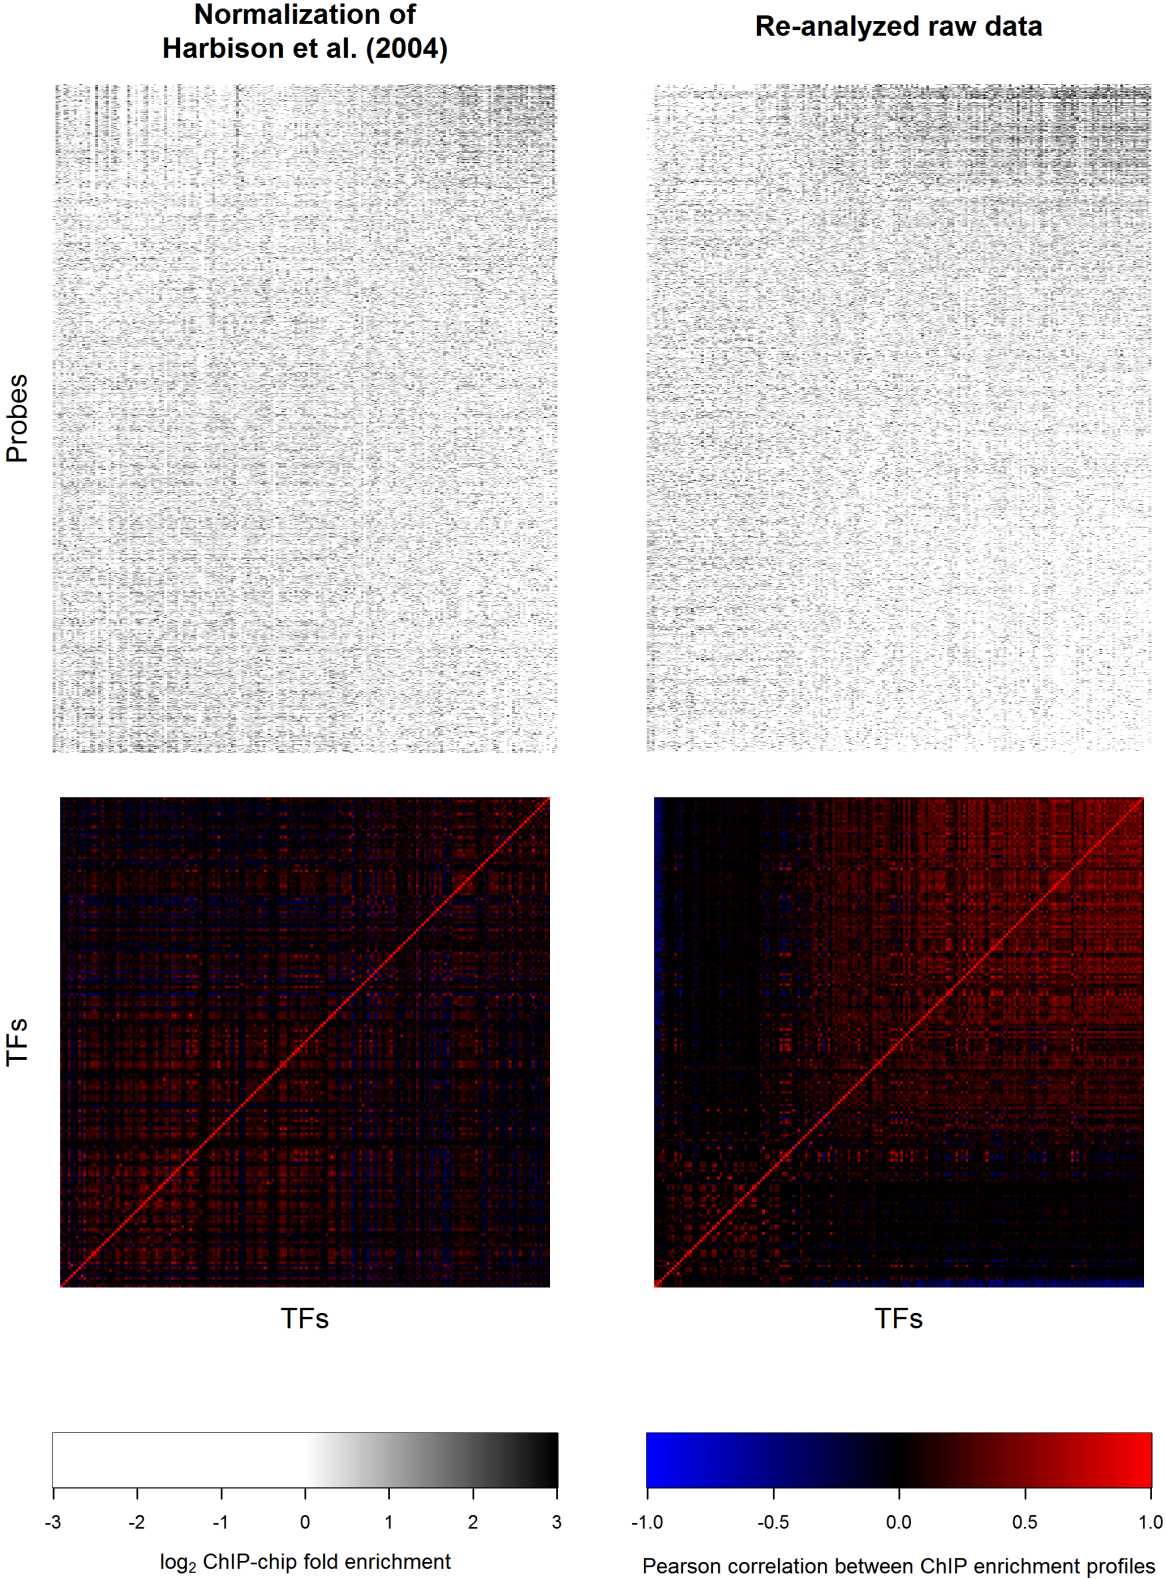

**Figure 3**

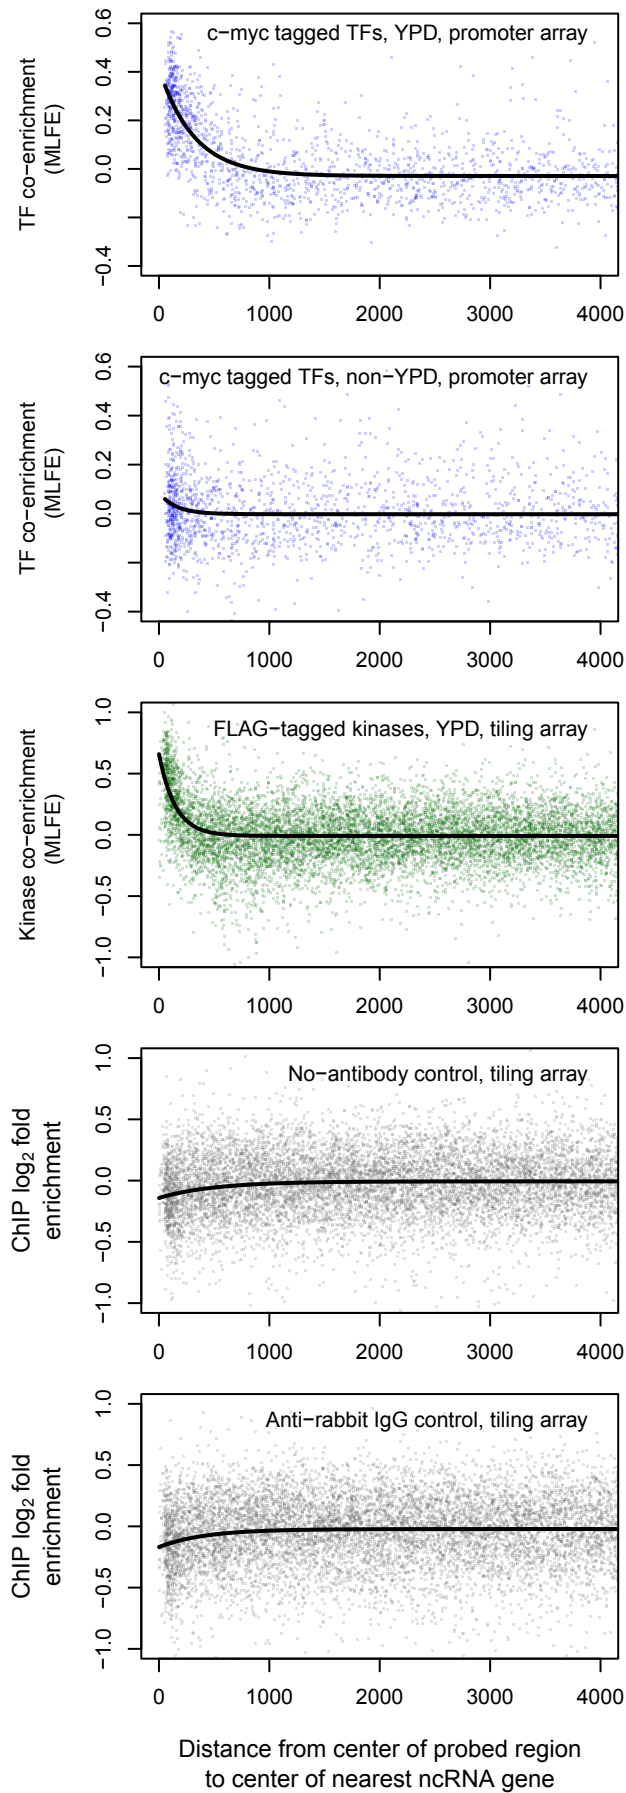

Figure 4

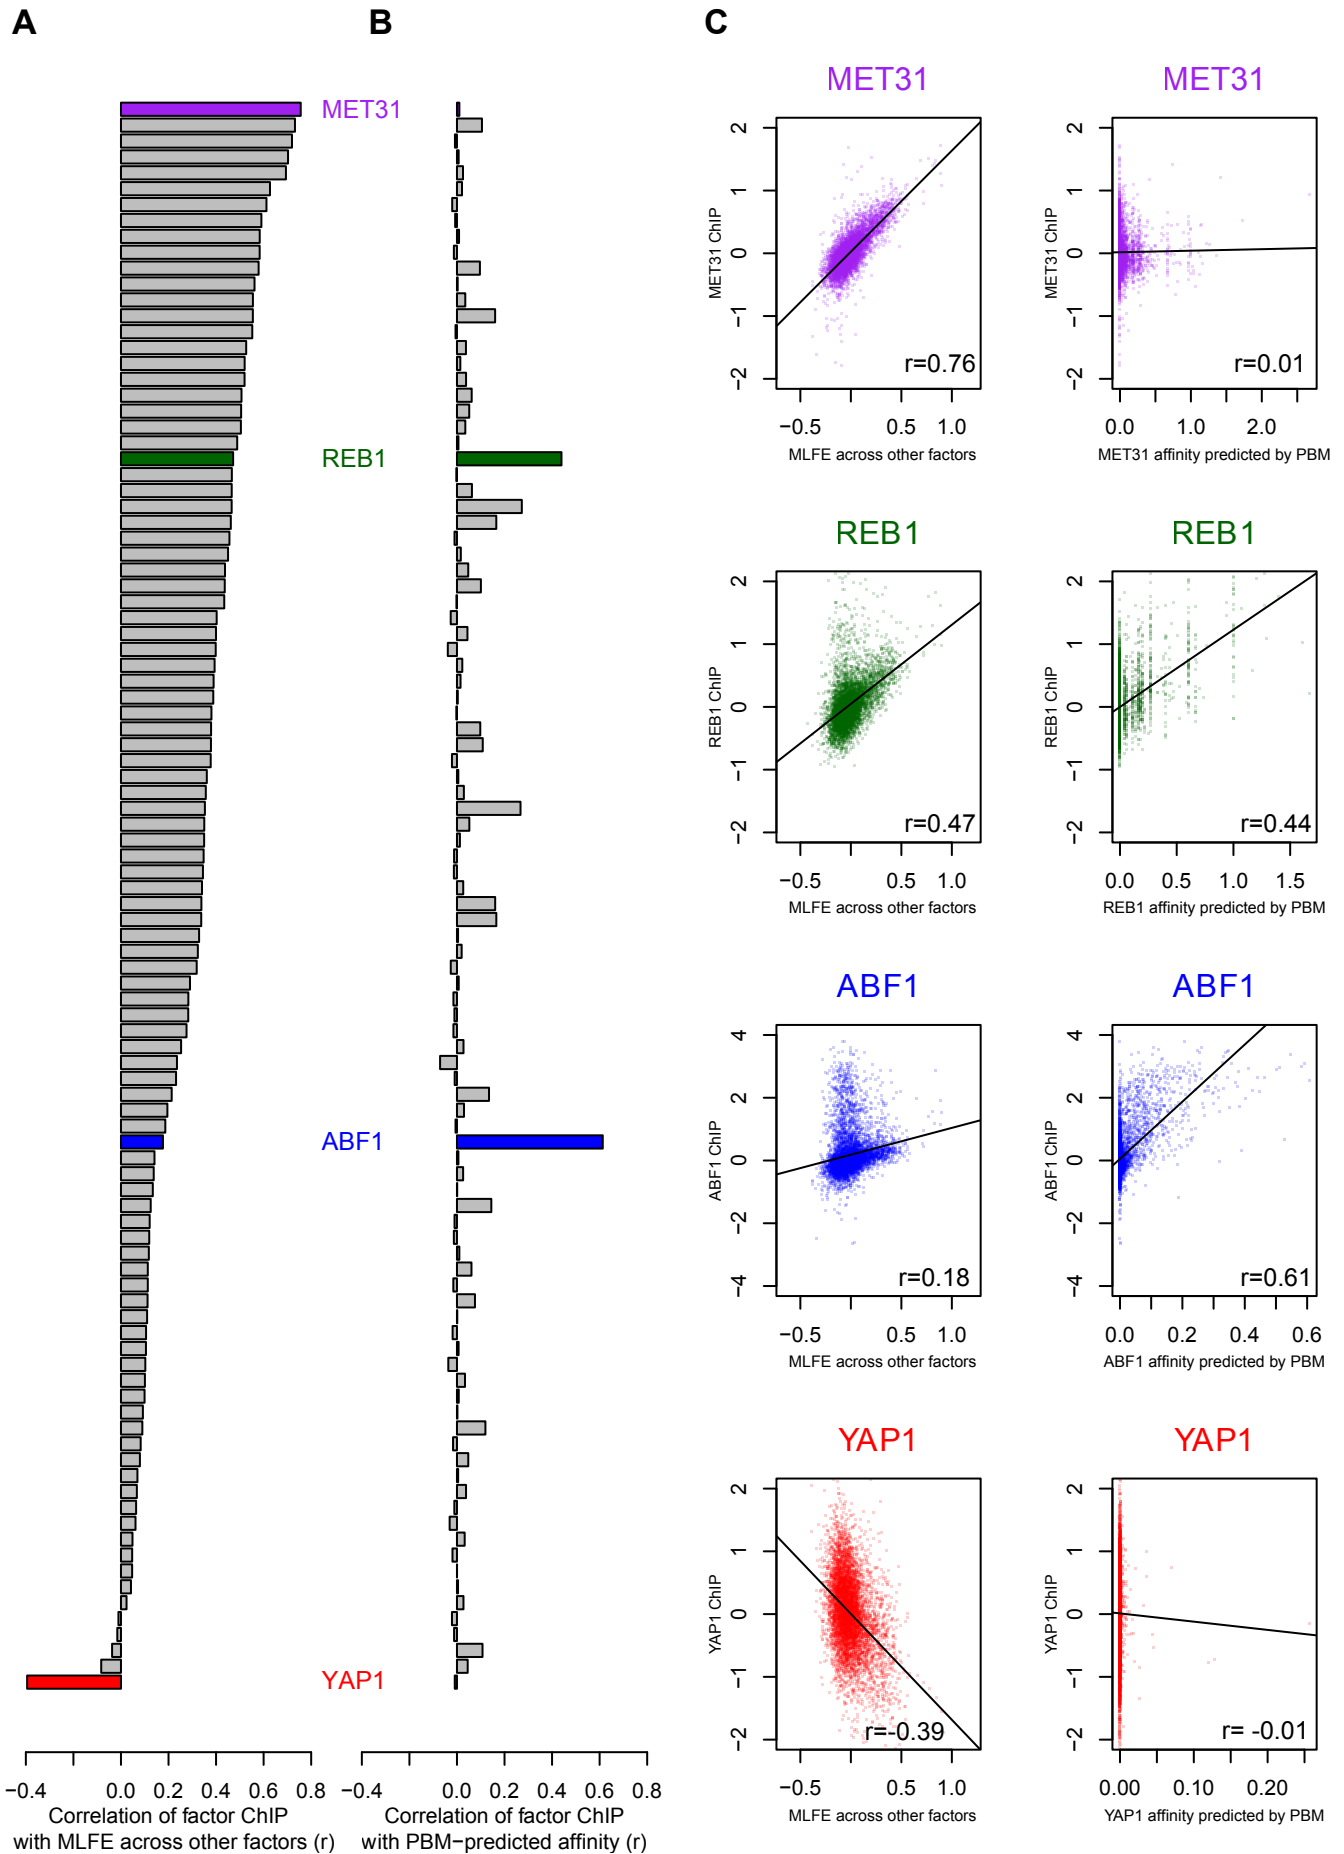

**Figure 5**

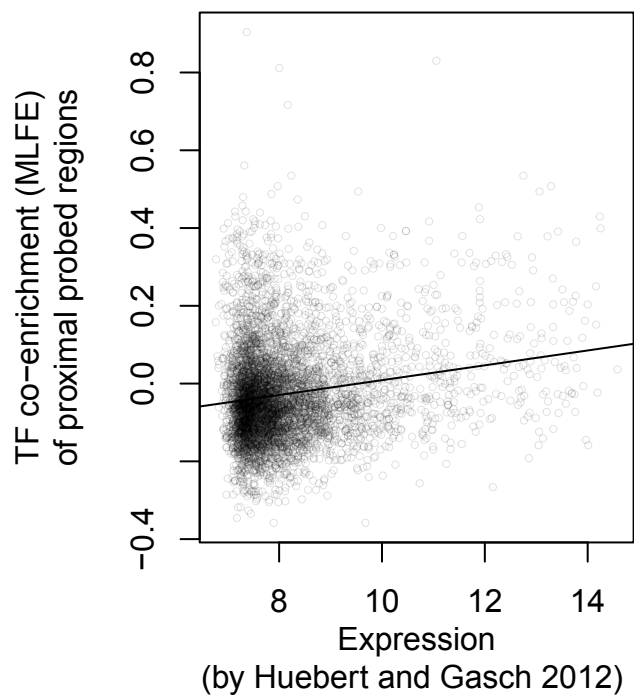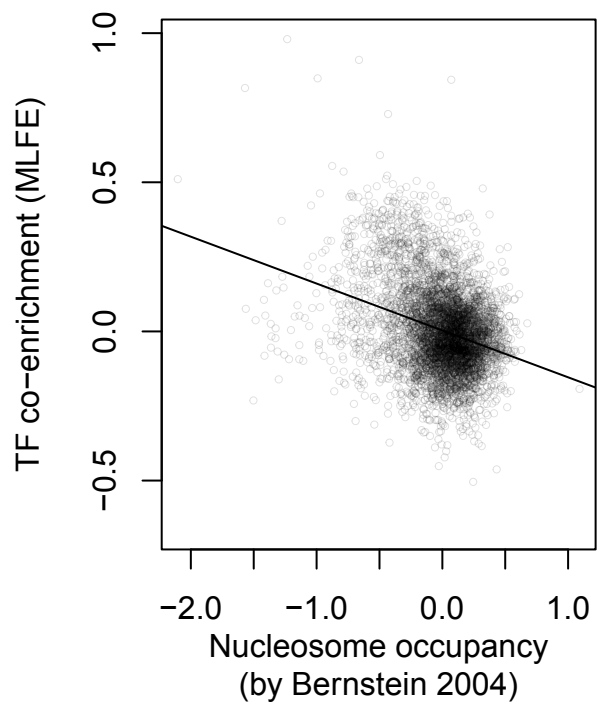

Figure 6

A.

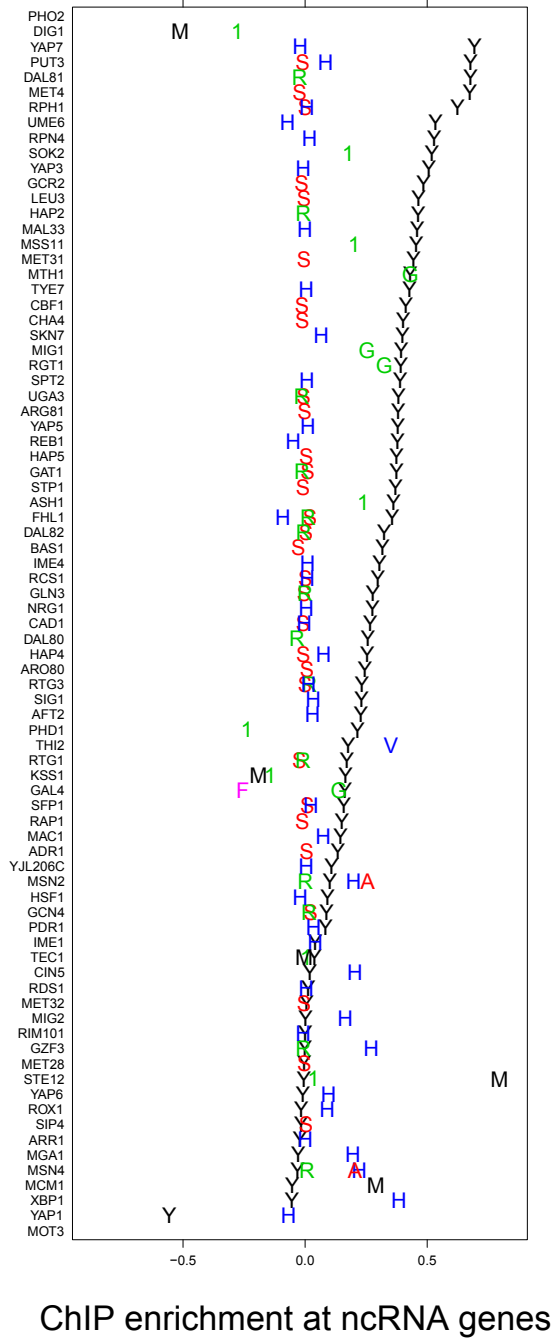

B.

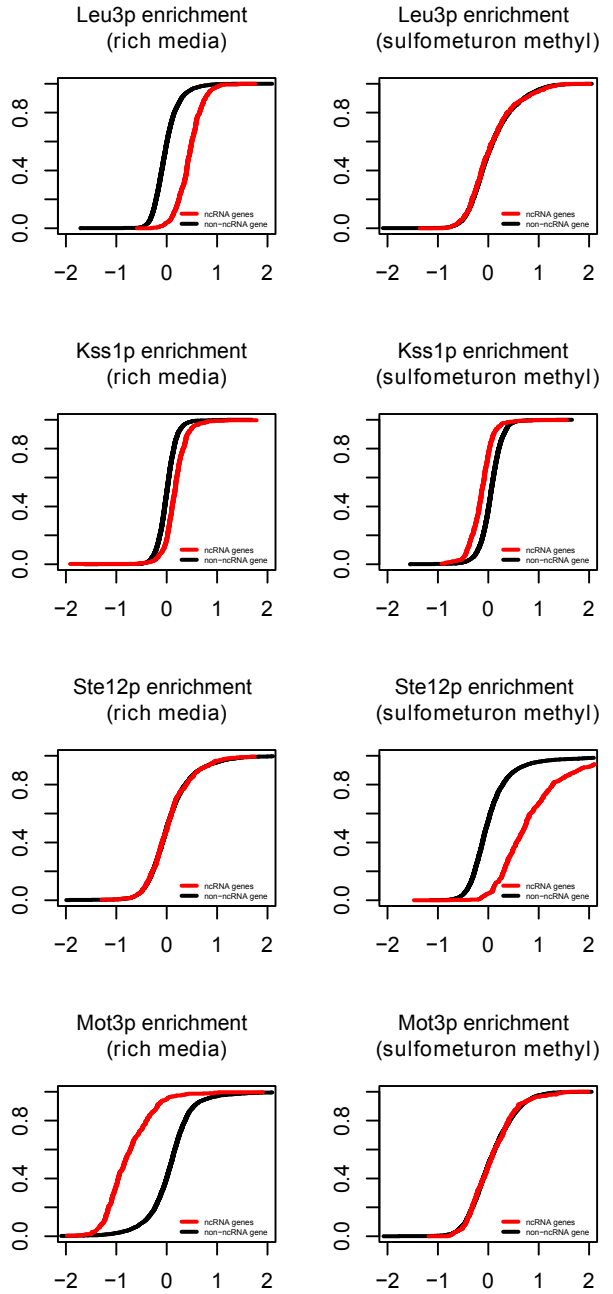

**Figure 7**

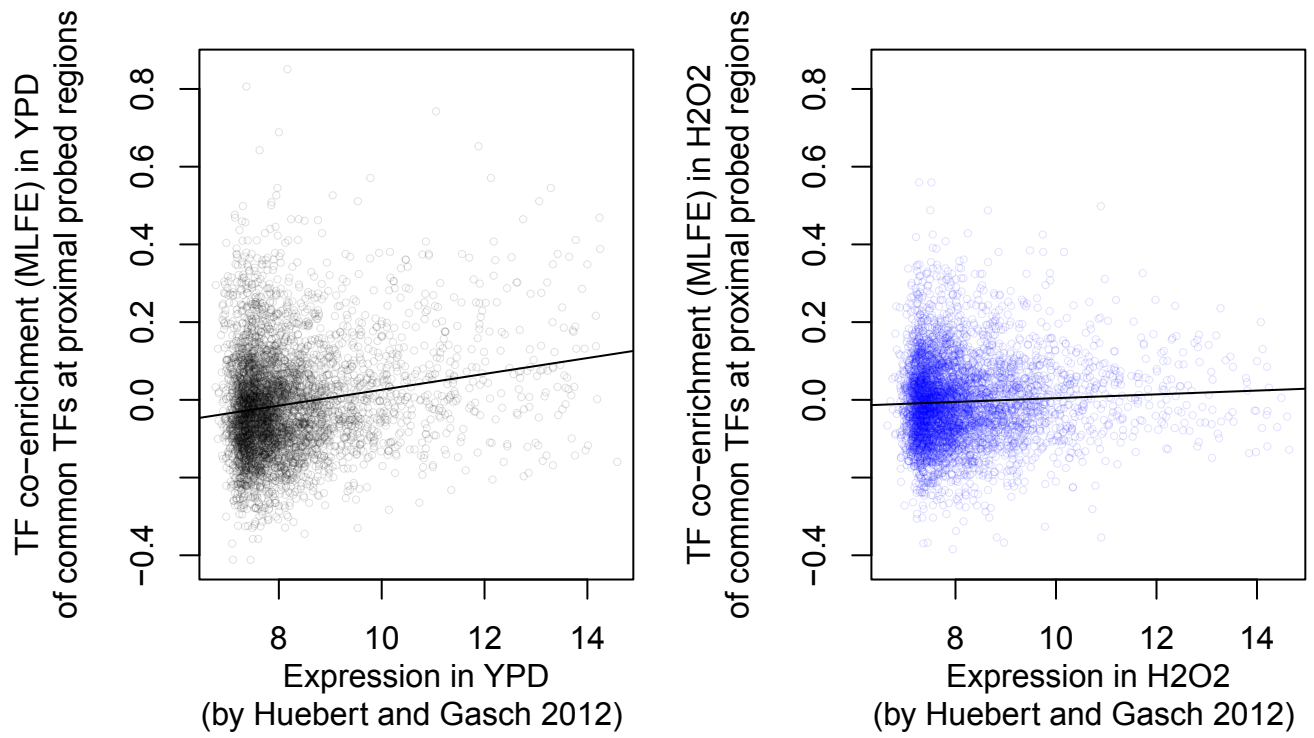

Figure 8

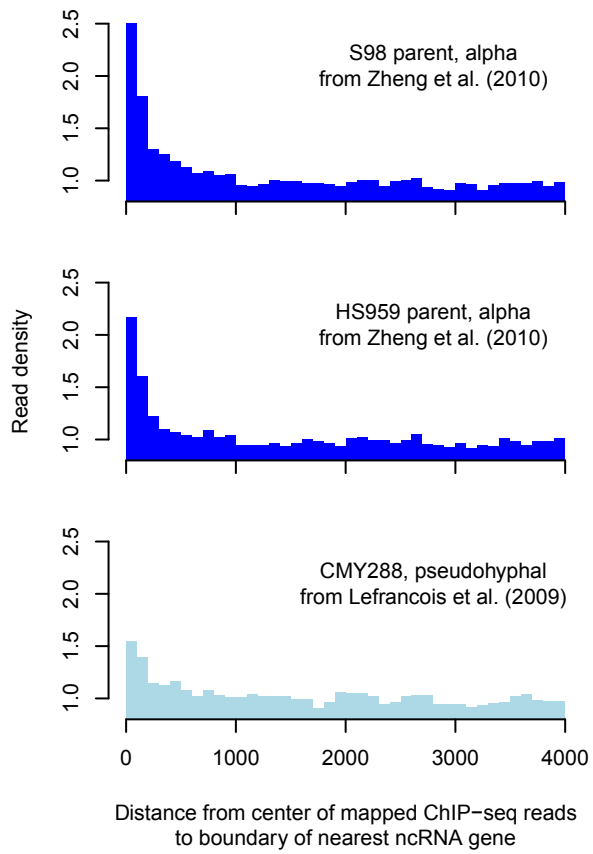

Source: http://www.biorxiv.org/content/10.1101/004614v1.full.pdf
